# Supplementary material for: Phenylalanine – a biogenic ligand with flexible η6- and η6:κ1-coordination at ruthenium(ii) centres
Source: Royal Society of Chemistry journal article supplement (doi:10.1039/c3dt50589h), 2013-01-01
Supplement: c3dt50589h.pdf [file c3dt50589h.pdf]

**Supplementary table S1.** Selected bond lengths (Å) and angles (°) for compound **17**

$[(\eta^6:k^1\text{-Phe})\text{Ru}(\text{enTs})]_2 \cdot 4\text{DMSO}$

|             |           |             |           |
|-------------|-----------|-------------|-----------|
| Ru1-C1      | 2.094(11) | Ru2-C19     | 2.126(12) |
| Ru1-C2      | 2.173(10) | Ru2-C20     | 2.151(12) |
| Ru1-C3      | 2.175(10) | Ru2-C21     | 2.172(10) |
| Ru1-C4      | 2.167(10) | Ru2-C22     | 2.240(9)  |
| Ru1-C5      | 2.167(11) | Ru2-C23     | 2.195(11) |
| Ru1-C6      | 2.191(11) | Ru2-C24     | 2.158(11) |
| Ru1-N1      | 2.153(8)  | Ru2-N4      | 2.148(9)  |
| Ru1-N2      | 2.103(9)  | Ru2-N5      | 2.137(8)  |
| Ru1-N3      | 2.079(9)  | Ru2-N6      | 2.130(8)  |
| C8-C9       | 1.510(11) | C26-C27     | 1.535(15) |
| C9-O1       | 1.205(12) | O5-C27      | 1.325(16) |
| C9-O2       | 1.226(13) | O6-C27      | 1.211(15) |
| N3-S1       | 1.597(9)  | N6-S2       | 1.561(10) |
| O3-S1       | 1.431(8)  | O7-S2       | 1.447(8)  |
| O4-S1       | 1.432(8)  | O8-S2       | 1.444(8)  |
|             |           |             |           |
| C6—C1—Ru1   | 74.9 (6)  | C2—C1—Ru1   | 73.9 (7)  |
| C7—C1—Ru1   | 115.8 (7) | C3—C2—Ru1   | 71.2 (6)  |
| C1—C2—Ru1   | 67.8 (6)  | Ru1—C2—H2   | 134.2     |
| C2—C3—Ru1   | 71.1 (6)  | C4—C3—Ru1   | 70.5 (6)  |
| Ru1—C3—H3   | 130.4     | C4—C5—Ru1   | 71.7 (6)  |
| C6—C5—Ru1   | 72.3 (7)  | Ru1—C5—H5   | 129.0     |
| C1—C6—Ru1   | 67.3 (6)  | C5—C6—Ru1   | 70.4 (7)  |
| Ru1—C6—H6   | 135.9     | Ru1—N1—H1A  | 109.5     |
| Ru1—N1—H1B  | 109.5     | C10—N2—Ru1  | 111.1 (7) |
| Ru1—N2—H2A  | 109.4     | Ru1—N2—H2B  | 109.4     |
| C26—N4—Ru2  | 111.2 (5) | Ru2—N4—H34E | 109.4     |
| Ru2—N4—H34F | 109.4     | C28—N5—Ru2  | 111.8 (6) |
| Ru2—N5—H5A  | 109.3     | Ru2—N5—H5B  | 109.3     |
| N3—Ru1—N2   | 79.2 (3)  | C21—C20—Ru2 | 72.6 (7)  |
| N3—Ru1—C1   | 141.2 (4) | C19—C20—Ru2 | 69.6 (7)  |
| N2—Ru1—C1   | 135.3 (4) | N3—Ru1—N1   | 86.8 (3)  |
| N2—Ru1—N1   | 88.2 (3)  | Ru2—C20—H20 | 131.7     |
| C1—Ru1—N1   | 78.7 (4)  | N3—Ru1—C5   | 97.1 (4)  |
| C20—C21—Ru2 | 70.9 (7)  | N2—Ru1—C5   | 139.3 (4) |
| C22—C21—Ru2 | 73.7 (6)  | C1—Ru1—C5   | 68.8 (4)  |
| N1—Ru1—C5   | 132.4 (4) | N3—Ru1—C4   | 108.6 (4) |
| Ru2—C21—H21 | 129.4     | N2—Ru1—C4   | 105.8 (4) |
| C1—Ru1—C4   | 81.9 (4)  | N1—Ru1—C4   | 160.6 (3) |
| C22—C23—Ru2 | 72.7 (6)  | C5—Ru1—C4   | 36.6 (4)  |
| N3—Ru1—C2   | 176.9 (4) | N2—Ru1—C2   | 102.6 (4) |
| C1—Ru1—C2   | 38.3 (5)  | N1—Ru1—C2   | 95.8 (4)  |
| C23—C24—Ru2 | 72.1 (7)  | C5—Ru1—C2   | 79.9 (4)  |

|             |           |             |           |
|-------------|-----------|-------------|-----------|
| C19—C24—Ru2 | 69.4 (6)  | C4—Ru1—C2   | 68.5 (4)  |
| N3—Ru1—C3   | 140.3 (4) | N2—Ru1—C3   | 89.5 (4)  |
| Ru2—C24—H24 | 130.2     | C1—Ru1—C3   | 69.3 (4)  |
| Ru2—C23—H23 | 131.9     | N1—Ru1—C3   | 131.1 (4) |
| C5—Ru1—C3   | 67.6 (4)  | C4—Ru1—C3   | 38.5 (4)  |
| C2—Ru1—C3   | 37.7 (4)  | N3—Ru1—C6   | 110.8 (4) |
| N2—Ru1—C6   | 168.8 (4) | C1—Ru1—C6   | 37.8 (4)  |
| N1—Ru1—C6   | 97.2 (4)  | C5—Ru1—C6   | 37.3 (4)  |
| C4—Ru1—C6   | 66.8 (4)  | C2—Ru1—C6   | 67.2 (4)  |
| C3—Ru1—C6   | 79.6 (4)  | C19—Ru2—N6  | 134.9 (4) |
| C19—Ru2—N4  | 79.8 (4)  | N6—Ru2—N4   | 86.5 (3)  |
| C19—Ru2—N5  | 142.7 (4) | N6—Ru2—N5   | 78.7 (4)  |
| N4—Ru2—N5   | 88.4 (3)  | C19—Ru2—C20 | 38.9 (4)  |
| N6—Ru2—C20  | 173.4 (5) | N4—Ru2—C20  | 93.5 (4)  |
| N5—Ru2—C20  | 107.9 (4) | C19—Ru2—C24 | 38.8 (4)  |
| N6—Ru2—C24  | 104.1 (4) | N4—Ru2—C24  | 100.3 (4) |
| N5—Ru2—C24  | 170.9 (4) | C20—Ru2—C24 | 69.4 (4)  |
| C19—Ru2—C21 | 68.8 (4)  | N6—Ru2—C21  | 145.7 (4) |
| N4—Ru2—C21  | 126.3 (4) | N5—Ru2—C21  | 91.3 (4)  |
| C20—Ru2—C21 | 36.6 (4)  | C24—Ru2—C21 | 81.6 (4)  |
| C19—Ru2—C23 | 69.3 (4)  | N6—Ru2—C23  | 95.4 (4)  |
| N4—Ru2—C23  | 138.0 (4) | N5—Ru2—C23  | 133.2 (4) |
| C20—Ru2—C23 | 80.3 (4)  | C24—Ru2—C23 | 38.5 (5)  |
| C21—Ru2—C23 | 67.8 (4)  | C19—Ru2—C22 | 82.4 (4)  |
| N6—Ru2—C22  | 111.8 (4) | N4—Ru2—C22  | 160.6 (3) |
| N5—Ru2—C22  | 101.1 (3) | C20—Ru2—C22 | 67.6 (4)  |
| C24—Ru2—C22 | 69.8 (4)  | C21—Ru2—C22 | 37.7 (4)  |
| C23—Ru2—C22 | 38.0 (4)  |             |           |

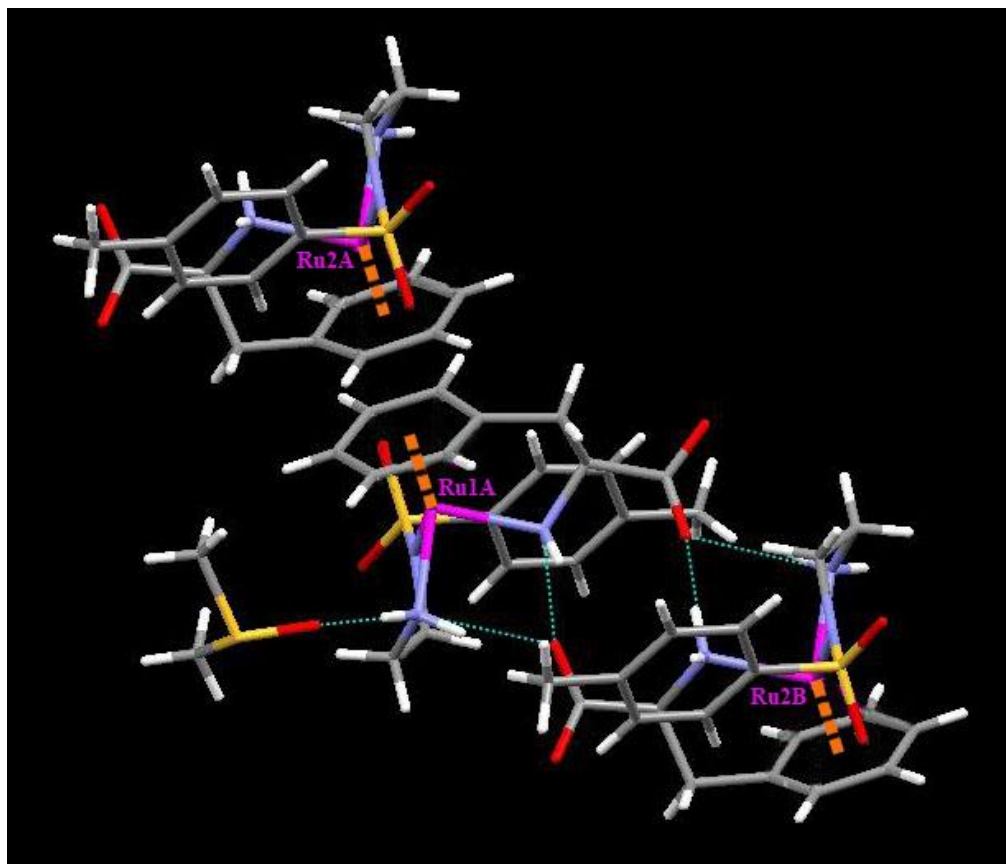

**Supplementary figure S2.** Representation of hydrogen bonding network and pi stacking in the crystal of **17** ( $[(\eta^6\text{-}\kappa^1\text{-Phe})\text{Ru}(\text{enTs})]_2 \cdot 4\text{DMSO}$ ). The pi-stacking interaction occurs between Phenyl rings within the same unit cell, the hydrogen bonding connects two complexes of mirrored stereochemistry.

**Supplementary table S3.** Summary of distances and angles of hydrogen bonds.

| Nr | Donor --- H...Acceptor [ARU]        | d [pm]: D-H, H...A, D...A | angle [°]: D - H...A |
|----|-------------------------------------|---------------------------|----------------------|
| 1  | 1 N(1) --H(1A) ..O(6) [ x,-1+y,z]   | 0.92, 1.99, 2.859(15)     | 157                  |
| 2  | 1 N(2) --H(2A) ..O(6) [ x,-1+y,z]   | 0.92, 1.92, 2.820(14)     | 165                  |
| 3  | 1 N(2) --H(2B) ..O(9) [       ]     | 0.92, 1.95, 2.875(15)     | 179                  |
| 4  | 2 N(5) --H(5A) ..O(12) [ 1+x,y,1+z] | 0.92, 2.01, 2.926(15)     | 174                  |
| 5  | 2 N(5) --H(5B) ..O(1) [ x,1+y,z]    | 0.92, 2.02, 2.916(15)     | 165                  |
| 6  | 2 N(4) --H(34F) ..O(1) [ x,1+y,z]   | 0.92, 1.99, 2.844(15)     | 155                  |

**Supplementary table S4.** Analysis of short ring-interactions with Cg-Cg Distances < 6.0 Angstrom and Beta < 60.0 Deg.

```
=====
Cg(I) Res(I) Cg(J) [ ARU(J)]      Cg(1) [ 1] -> Cg(3) [ X,Y,Z]
Cg-Cg                             3.508(8)
Transformed J-plane P, Q, R, S:    -0.4578  0.7562  0.4674  6.3724
Alpha Beta Gamma:                  2.83  22.94  25.47
CgI_Perp CgJ_Perp:                 3.167  3.231
-----
```

```
Cg(1)   C(1)   C(2)   C(3)   C(4)   C(5)   C(6)
Cg(3)   C(19)  C(20)  C(21)  C(22)  C(23)  C(24)
```

- Cg(I) = Plane number I (= ring number in () above)
- Cg-Cg = Distance between ring Centroids (Ang.)
- Alpha = Dihedral Angle between Planes I and J (Deg)
- Beta = Angle Cg(I)-->Cg(J) or Cg(I)-->Me vector and normal to plane I (Deg)
- Gamma = Angle Cg(I)-->Cg(J) vector and normal to plane J (Deg)
- P,Q,R,S = J-Plane Parameters for Carth. Coord. (Xo, Yo, Zo)
- CgI\_Perp = Perpendicular distance of Cg(I) on ring J (Ang.)
- CgJ\_Perp = Perpendicular distance of Cg(J) on ring I (Ang.)

**Supplementary table S5.** Analysis of X-H...Cg(Pi-Ring) Interactions (H..Cg < 3.0 Ang. - Gamma < 30.0 Deg)

```
=====
X--H(I) Res(I) Cg(J) [ ARU(J)]      C(18) -H(18B) [ 1] -> Cg(4) [1+X,-1+Y,Z]
H..Cg transformed                    2.73
J-Plane P, Q, R, S                   0.5543  0.8031  0.2186  0.5587
H-Perp Gamma                          2.680  10.50
X-H..Cg X..Cg X-H,Pi                  149  3.599(18)  65
-----
```

6-Membered Ring ( 4) C(30) --> C(31) --> C(32) --> C(33) --> C(34) --> C(35)
